# Supplementary material
Source: PubMed Central journal article supplement (PMC7454549)

## SUPPLEMENTAL MATERIAL

**Supplemental Table I. COVID-19 modified early warning score (COVID-19 MEWS) calculation**

|                                       | <b>3</b> | <b>2</b> | <b>1</b>  | <b>0</b>  | <b>1</b>  | <b>2</b> | <b>3</b>                                    |
|---------------------------------------|----------|----------|-----------|-----------|-----------|----------|---------------------------------------------|
| Age (years)                           |          |          |           | <65       |           |          | ≥65                                         |
| Respiration rate (breaths/min)        | ≤8       |          | 9-11      | 12-20     |           | 21-24    | ≥25                                         |
| Ambient O <sub>2</sub> saturation (%) | ≤91      | 92-93    | 94-95     | ≥96       |           |          |                                             |
| Any supplemental oxygen               |          | yes      |           | no        |           |          |                                             |
| Systolic blood pressure (mmHg)        | ≤90      | 91-100   | 101-110   | 111-219   |           |          | ≥220                                        |
| Heart rate (beats/min)                | ≤40      |          | 41-50     | 51-90     | 91-110    | 111-130  | ≥131                                        |
| consciousness                         |          |          |           | alert     |           |          | Drowsiness<br>lethargy<br>coma<br>confusion |
| Temperature (Celsius)                 | ≤35.0    |          | 35.1-36.0 | 36.1-38.0 | 38.1-39.0 | ≥39.1    |                                             |

**Supplemental Table II. Baseline echocardiography and ECG in patients stratified by lung ultrasound score**

| Parameter                                                     | All patients<br>n = 120 | Lung Ultrasound<br>Score 0-18<br>n = 80 | Lung Ultrasound<br>Score 19-36<br>n = 40 | P-value |
|---------------------------------------------------------------|-------------------------|-----------------------------------------|------------------------------------------|---------|
| <b>Baseline echocardiography</b>                              |                         |                                         |                                          |         |
| Left ventricular ejection fraction, %, mean $\pm$ SD          | 57.7 $\pm$ 5            | 58.2 $\pm$ 3.7                          | 56.7 $\pm$ 6.9                           | 0.22    |
| Left ventricular end-diastolic diameter, mm, mean $\pm$ SD    | 43.3 $\pm$ 6.6          | 43.0 $\pm$ 6                            | 43.9 $\pm$ 7.6                           | 0.51    |
| Left ventricular end-systolic diameter, mm, mean $\pm$ SD     | 28.1 $\pm$ 6.4          | 27.6 $\pm$ 5.2                          | 28.3 $\pm$ 6.3                           | 0.55    |
| Left atrial volume, mL, mean $\pm$ SD                         | 55.2 $\pm$ 25.4         | 56.4 $\pm$ 25.5                         | 52.6 $\pm$ 25.4                          | 0.48    |
| E/A, mean $\pm$ SD                                            | 1.07 $\pm$ 0.5          | 1.09 $\pm$ 0.5                          | 1.01 $\pm$ 0.3                           | 0.42    |
| E/e' average, mean $\pm$ SD                                   | 10.3 $\pm$ 6.3          | 10.3 $\pm$ 7.2                          | 10.3 $\pm$ 4.2                           | 0.99    |
| Right atrial pressure, mmHg, mean $\pm$ SD                    | 8 $\pm$ 4               | 8 $\pm$ 4.1                             | 8.1 $\pm$ 4                              | 0.86    |
| Tricuspid annular plane systolic excursion, mm, mean $\pm$ SD | 2.3 $\pm$ 1.1           | 2.3 $\pm$ 0.4                           | 2.4 $\pm$ 1.8                            | 0.76    |
| Right ventricular S', cm/s, mean $\pm$ SD                     | 11.2 $\pm$ 3.2          | 11.2 $\pm$ 3.1                          | 11.2 $\pm$ 3.4                           | 0.94    |
| <b>Baseline ECG findings</b>                                  |                         |                                         |                                          |         |
| Normal sinus rhythm, n (%)                                    | 88 (73.3)               | 58 (90.6)                               | 30 (85.7)                                | 0.51    |
| Atrial fibrillation/flutter, n (%)                            | 9 (7.5)                 | 5 (7.8)                                 | 4 (11.4)                                 | 0.72    |
| RBBB, n (%)                                                   | 6 (5)                   | 3 (4.7)                                 | 3 (8.6)                                  | 0.66    |
| LBBB, n (%)                                                   | 3 (2.5)                 | 0 (0)                                   | 3 (8.6)                                  | 0.042   |
| ST-segment elevation, n (%)                                   | 2 (1.7)                 | 2 (3)                                   | 0 (0)                                    | 0.54    |

|                              |                    |                   |                       |      |
|------------------------------|--------------------|-------------------|-----------------------|------|
| ST-segment depression, n (%) | 5 (4.2)            | 3 (4.7)           | 2 (5.7)               | 0.99 |
| T wave inversion, n (%)      | 15 (12.5)          | 9 (14.1)          | 6 (17.1)              | 0.77 |
| Long QT, n (%)               | 7 (5.8)            | 3 (4.7)           | 4 (11.4)              | 0.24 |
| QTc, msec, median (IQR)      | 417 (395.75 - 440) | 417 (396 - 438.7) | 416.5 (393.7 - 451.7) | 0.84 |

**Supplemental Table III. Lung ultrasound in clinically-deteriorating patients**

| <b>Parameter</b>                    | <b>Baseline<br/>n=20</b> | <b>Follow up<br/>n=20</b> | <b>P-value</b> |
|-------------------------------------|--------------------------|---------------------------|----------------|
| Pleural effusion, n (%)             | 1 (5)                    | 1 (5)                     | NS             |
| Homogenous diffuse B-lines, n (%)   | 0 (0)                    | 0 (0)                     | NS             |
| Pleural thickening, n (%)           | 19 (95)                  | 20 (100)                  | NS             |
| Lung ultrasound score, median (IQR) | 17 (7 – 22)              | 20 (17 - 26)              | 0.0009         |

**Supplemental Table IV. Univariable analysis of baseline predictors of clinical deterioration and death**

| Parameter                                | Outcome                      |         |                                    |         |                                   |         |
|------------------------------------------|------------------------------|---------|------------------------------------|---------|-----------------------------------|---------|
|                                          | Death<br>N=23<br>HR (95% CI) | P-value | Intubation<br>N= 14<br>HR (95% CI) | P-value | Composite<br>N= 30<br>HR (95% CI) | P-value |
| Age                                      | 1.04 (1.02-1.06)             | 0.001   | 1.00 (0.98-1.03)                   | 0.7     | 1.03 (1.01-1.05)                  | 0.001   |
| Male gender                              | 1.02 (0.36-3.2)              | 0.9     | 1.4 (0.46-5.0)                     | 0.6     | 1.06 (0.47-2.6)                   | 0.93    |
| Modified early warning score (per point) | 1.3 (1.17-1.5)               | <0.001  | 1.35 (1.16-1.6)                    | <0.001  | 1.4 (1.26-1.56)                   | <0.001  |
| Temperature (per degree Celsius)         | 1.18 (0.65-2.04)             | 0.5     | 1.89 (1.03-3.3)                    | 0.04    | 1.8 (1.18-2.7)                    | 0.005   |
| O <sub>2</sub> saturation (per %)        | 0.85 (0.78-0.92)             | <0.001  | 0.87 (0.79-0.97)                   | 0.01    | 0.85 (0.79-0.91)                  | <0.001  |
| Heart Rate (per 1 beat per minute)       | 1.00 (0.97-1.03)             | 0.6     | 1.04 (1.00-1.07)                   | 0.02    | 1.03 (1.00-1.05)                  | 0.05    |
| Systolic blood pressure (per 1 mmHg)     | 0.98 (0.96-1.01)             | 0.4     | 0.98 (0.95-1.01)                   | 0.2     | 0.99 (0.98-1.02)                  | 0.92    |
| Diastolic blood pressure (per 1 mmHg)    | 0.97 (0.95-1.00)             | 0.2     | 0.99 (0.96-1.03)                   | 0.7     | 0.99 (0.97-1.02)                  | 0.92    |
| Lung crepitation                         | 2.0 (0.6- 5.9)               | 0.2     | 2.1 (0.6- 7.1)                     | 0.2     | 1.9 (0.7- 4.5)                    | 0.21    |
| Leg edema                                | 2.3 (0.11- 2.7)              | 0.3     | 2.2 (0.5- 6.9)                     | 0.2     | 1.3 (0.2- 4.7)                    | 0.74    |
| C-reactive protein (per mg/L)            | 1.00 (0.99-1.01)             | 0.1     | 1.01 (1.00-1.02)                   | <0.001  | 1.01 (1.00-1.01)                  | 0.002   |
| D-dimer (per mg/L)                       | 1.07 (0.91-1.18)             | 0.3     | 1.18 (1.06-1.3)                    | 0.005   | 1.12 (0.99-1.22)                  | 0.06    |

|                                       |                  |       |                  |        |                  |         |
|---------------------------------------|------------------|-------|------------------|--------|------------------|---------|
| Troponin-I (per ng/L)                 | 1.0 (0.99-1.00)  | 0.8   | 1.00 (1.00-1.01) | 0.03   | 1.00 (0.99-1.00) | 0.24    |
| Brain natriuretic peptide (per pg/mL) | 1.00 (1.0-1.02)  | 0.02  | 1.00 (0.99-1.01) | 0.9    | 1.00 (0.99-1.01) | 0.08    |
| <b>Chest X-ray</b>                    |                  |       |                  |        |                  |         |
| Bilateral infiltrates                 | 2.5 (1.07-6.1)   | 0.03  | 2.5 (0.8-9.6)    | 0.1    | 1.9 (0.8-4.4)    | 0.09    |
| Lobar infiltrates                     | 1.2 (0.2-4.3)    | 0.8   | 1.7 (0.3-6.6)    | 0.5    | 1.8 (0.5-4.8)    | 0.31    |
| Pleural effusion                      | 1.7 (0.5-5.0)    | 0.4   | 1.8 (0.4-6.1)    | 0.4    | 1.2 (0.3-3.2)    | 0.71    |
| Hilar congestion                      | 3.7 (1.07-10.2)  | 0.04  | 0.7 (0.05-4.0)   | 0.8    | 2.4 (0.55-7.0)   | 0.21    |
| <b>Lung Ultrasound</b>                |                  |       |                  |        |                  |         |
| Lung ultrasound score (per point)     | 1.08 (1.02-1.16) | 0.008 | 1.2 (1.1-1.3)    | <0.001 | 1.12 (1.05-1.2)  | 0.0008  |
| LUS score>18                          | 2.65 (1.14-6.3)  | 0.02  | 11.5 (1.4- 235)  | 0.02   | 4.24 (2.06-9.2)  | <0.0001 |
| Pleural effusion                      | 3.7 (1.07-10)    | 0.04  | 1.2 (0.06-6)     | 0.9    | 2.4 (0.6-6.9)    | 0.22    |
| Pleural thickening                    | 4.6 (1.1-14)     | 0.04  | 14 (5-22)        | 0.01   | 5.2 (1.08-10.2)  | 0.03    |
| Subpleural consolidations             | 1.4 (0.5-4.8)    | 0.5   | 15 (2.0-31)      | 0.007  | 1.6 (0.6-5.5)    | 0.3     |
|                                       |                  |       |                  |        |                  |         |

**Supplemental Figure I.** Lung ultrasound in a selected patient at baseline (**A**) and after clinical deterioration (**B**). Note the shift from A-lines in anterior segment and B-lines at posterior segments at baseline to a predominant B-lines pattern including the anterior segments. This change corresponds to significant worsening in lung aeration.

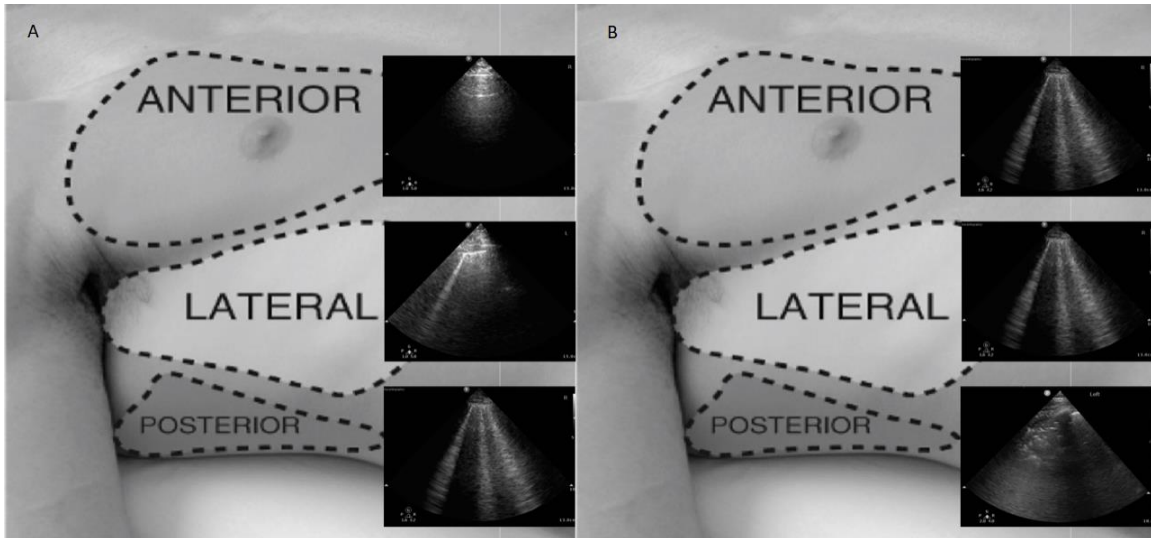

Supplement: 134_2020_6212_MOESM1_ESM.pdf [file 134_2020_6212_MOESM1_ESM.pdf]
